# Supplementary material for: Interrupted reprogramming of alveolar type II cells induces progenitor-like cells that ameliorate pulmonary fibrosis
Source: PubMed Central journal article supplement (PMC6123410; doi:10.1038/s41536-018-0052-5), 2018-09-04
Supplement: 41536_2018_52_MOESM1_ESM.pdf [file 41536_2018_52_MOESM1_ESM.pdf]

## Supplementary figure and text

### Figure S1

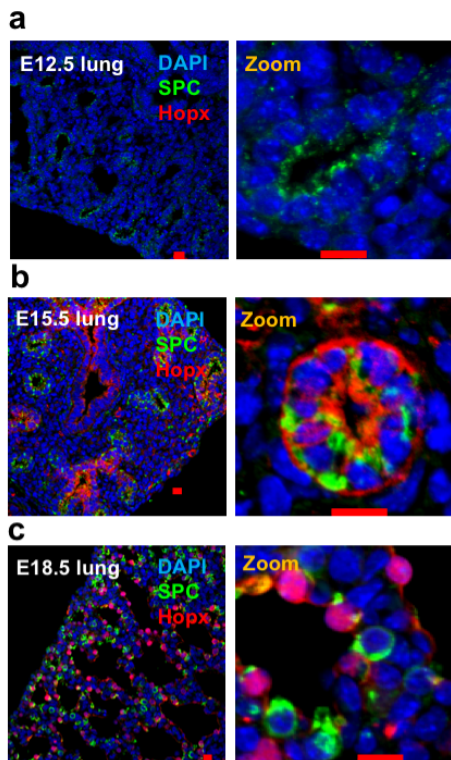

### Figure S1. Time course of expression of Hopx and SPC in embryonic lungs

Confocal microscopy images depicting the expression of Hopx and SPC in (a) E12.5, (b) E15.5 and (c) E18.5 lungs, with nuclear stain DAPI (blue), SPC (green) and Hopx (red). Scale bar, 10 μm.

**Figure S2**

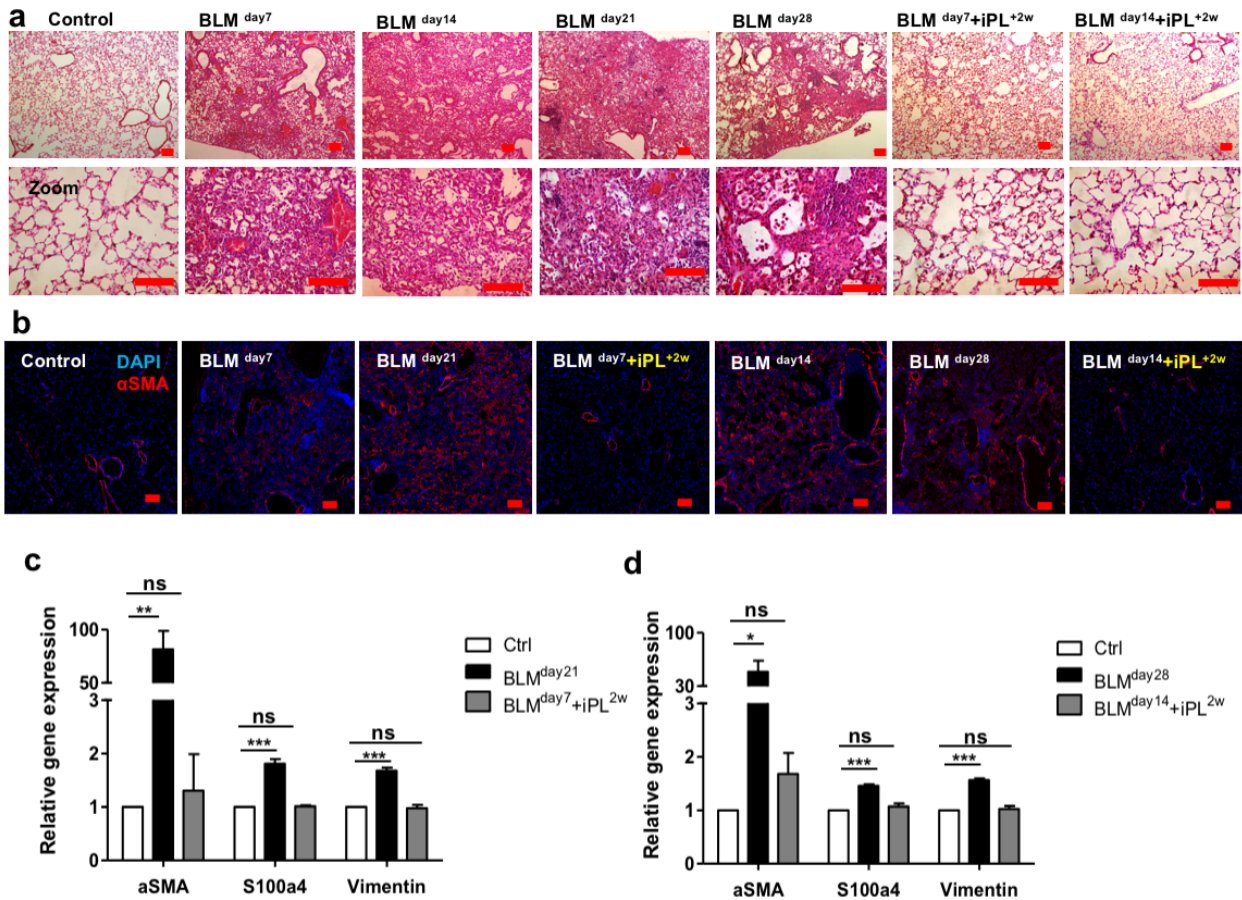

**Figure S2. Transplant of AEC-II-iPL cells ameliorates bleomycin-mediated pulmonary fibrosis**

(a) Representative images of hematoxylin–eosin stained lung sections in all the experimental groups after 7, 14, 21 and 28 days of BLM-induced pulmonary fibrosis. (b) Immunostaining of lung sections in all experimental groups with nuclear stain DAPI (blue) and  $\alpha$ SMA (red). Expression of mesenchymal genes ( $\alpha$ SMA, S100a4 and vimentin) in BLM non-treated (c, BLM<sup>day21</sup>) (d, BLM<sup>day28</sup>) and BLM-treated (c, BLM<sup>day7+iPL<sup>2w</sup></sup>) (d, BLM<sup>day14+iPL<sup>2w</sup></sup>) recipient lungs, as measured by qRT-PCR

comparing fold-differences in expression to saline treated control (Ctrl) lung. For c and d, values are mean  $\pm$  S.D. of three independent biological replicates. \*,  $p < 0.05$ ; \*\*,  $p < 0.001$ ; \*\*\*,  $p < 0.0001$ . Scale bar, 100  $\mu\text{m}$ .

## Tables

Table 1: Tabulated list of all qPCR primers used in the studies.

| <b>qPCR primers</b> |                              |                         |               |
|---------------------|------------------------------|-------------------------|---------------|
| <b>Gene name</b>    | <b>Primer sequence 5'-3'</b> |                         | <b>length</b> |
| mCol4F2A            | Forward                      | GGCTGGAGATGTTGAGAGCAA   | 21            |
|                     | Reverse                      | AAAGGAAATCCAGTGGCGC     | 19            |
| Sftpc               | Forward                      | GCAAAGAGGTCCTGATGGAG    | 20            |
|                     | Reverse                      | GCAGTAGGTTCCCTGGAGCTG   | 20            |
| AQP5                | Forward                      | ATGAACCCAGCCCGATCTTT    | 20            |
|                     | Reverse                      | ACGATCGGTCCTACCCAGAAG   | 21            |
| $\alpha$ -SMA       | Forward                      | CCCAGACATCAGGGAGTAATGG  | 22            |
|                     | Reverse                      | TCTATCGGATACTTCAGCGTCA  | 22            |
| S100A4              | Forward                      | TCCACAAATACTCAGGCAAAGAG | 23            |
|                     | Reverse                      | GCAGCTCCCTGGTCAGTAG     | 19            |
| Vimentin            | Forward                      | CGTCCACACGCACCTACAG     | 19            |
|                     | Reverse                      | GGGGGATGAGGAATAGAGGCT   | 21            |

Table 2: Tabulated list of all antibodies used in the studies

| <b>Antibody name</b> | <b>Company</b> | <b>Cat. #</b> | <b>Clone name</b> | <b>Lot #</b> | <b>Validation</b> |
|----------------------|----------------|---------------|-------------------|--------------|-------------------|
| CD45                 | BD Pharmingen  | 553081        | 30-F11            | 3221754      | Adult lung cells  |
| CD31                 | BD Pharmingen  | 553373        | MEC 13.3          | 2286929      | Adult lung cells  |
| EpCAM                | Abcam          | ab95641       | G 8.8             | GR267522-3   | Adult lung cells  |
| SPC                  | Millipore      | AB3786        |                   | 2464523      | Adult lung tissue |
|                      | Santa Cruz     | sc-7706       | M-20              | E1215        | Adult lung tissue |
| Hopx                 | Santa Cruz     | sc-398703     | E-1               | H0714        | Adult lung tissue |
| a-SMA                | Abcam          | Ab7817        | 1A4               | GR119216-4   | Adult lung tissue |
| Integrin $\alpha$ 6  | Biolegend      | 313611        | GoH3              | B143404      | Adult lung cells  |
| Integrin $\beta$ 4   | Abcam          | ab182120      | EPR17517          | GR214899-1   | Adult lung tissue |
|                      | Biolegend      | 123608        | 346-11A           | B144521      | Adult lung cells  |
| CD74                 | BD Pharmingen  | 561941        | In-1              | 313611       | Adult lung cells  |
| LAMP3                | Novusbio       | DDX0192P-100  | 1006F7.05         | DDX0192-011  | Adult lung tissue |

|            |               |          |         |            |                   |
|------------|---------------|----------|---------|------------|-------------------|
| Nanog      | Abcam         | ab80892  |         | GR40243-10 | R1-ESC cells      |
|            | BD Pharmingen | 560259   | M55-312 | 9933       | R1-ESC cells      |
| GFP        | Invitrogen    | A-21311  |         | 1567217    | Adult lung tissue |
| AQP5       | Abcam         | ab104751 |         | GR34237-29 | Adult lung tissue |
| SSEA-1     | Santa Cruz    | sc-21702 | 480     | E0710      | R1-ESC cells      |
| E-cadherin | Abcam         | ab11512  |         | GR127224-1 | Adult lung cells  |
